# Supplementary material
Source: PubMed Central journal article supplement (PMC4380986)
Supplement: pro0024-0561-sd1.pdf [file pro0024-0561-sd1.pdf]

## **Design of an Allosterically Regulated Retroaldolase.**

Elizabeth A. Raymond,<sup>1</sup> Korrie L. Mack,<sup>1</sup> Jennifer H. Yoon,<sup>1</sup> Olesia V. Moroz,<sup>1,2</sup> Yurii S. Moroz<sup>1,3</sup> and Ivan V. Korendovych<sup>1,\*</sup>

Affiliations:

<sup>1</sup>Syracuse University, Department of Chemistry, 111 College Place, Syracuse, NY 13244

<sup>2</sup>Present affiliation: Department of Chemistry, Kyiv National Taras Shevchenko University, 64 Volodymyrska Street, Kyiv, 01601, Ukraine.

<sup>3</sup>Present affiliation: ChemBioCenter, Kyiv National Taras Shevchenko University, 61 Chervonotkatska Street, Kyiv 02094, Ukraine.

Corresponding author: Ivan V. Korendovych, Syracuse University, Department of Chemistry, 111 College Place, Syracuse, NY 13244, Tel: 315-443-1661, Fax: 315-443-4070, e-mail: ikorendo@syr.edu

### **Supplementary Information**

**Table S1. Protein sequences of calmodulin and its mutants.**

| Proteins  | Sequence                                                                                                                                                                                                          |  |  |  |
|-----------|-------------------------------------------------------------------------------------------------------------------------------------------------------------------------------------------------------------------|--|--|--|
| cCaM      | SLMKD <b>T</b> DSEE EIREAFRVFD KDGNGYISAA LRHVMTNLG<br>EKLTDEEVDE MIREADIDGD GQVNYEEFVQ MMTAK                                                                                                                     |  |  |  |
| CaM       | SLMADQLTEE QIAEFKEAFS LFDKDG <b>D</b> GTI TKELGTVMR<br>SLGQNPTEAE LQDMINEVDA DGNGTIDFPE LTMMARKMK<br>DTDSEEEIRE AFRVFDK <b>D</b> GN GYISAAELRH MTNLGEKLT<br>DEEVDEMIRE ADIDGDGQVN YE <b>E</b> EFVQMMTA K          |  |  |  |
| CaM F92K  | SLMADQLTEE QIAEFKEAFS LFDKDG <b>D</b> GTI TKELGTVMR<br>SLGQNPTEAE LQDMINEVDA DGNGTIDFPE LTMMARKMK<br>DTDSEEEIRE AFRV <b>K</b> DKDGN GYISAAELRH MTNLGEKLT<br>DEEVDEMIRE ADIDGDGQVN YE <b>E</b> EFVQMMTA K          |  |  |  |
| CaM L105K | SLMADQLTEE QIAEFKEAFS LFDKDG <b>D</b> GTI TKELGTVMR<br>SLGQNPTEAE LQDMINEVDA DGNGTIDFPE LTMMARKMK<br>DTDSEEEIRE AFRVFDK <b>D</b> GN GYISAAE <b>K</b> RH MTNLGEKLT<br>DEEVDEMIRE ADIDGDGQVN YE <b>E</b> EFVQMMTA K |  |  |  |
| CaMWN     | SLM <b>A</b> DTDSEE EIREAFRVFD <b>R</b> DGNGYISAA LR <b>I</b> VMTNLG<br><b>E</b> NLTDEEVDE MIREADIDGD GQVNYEEFVQ MMT <b>A</b> <b>L</b>                                                                            |  |  |  |

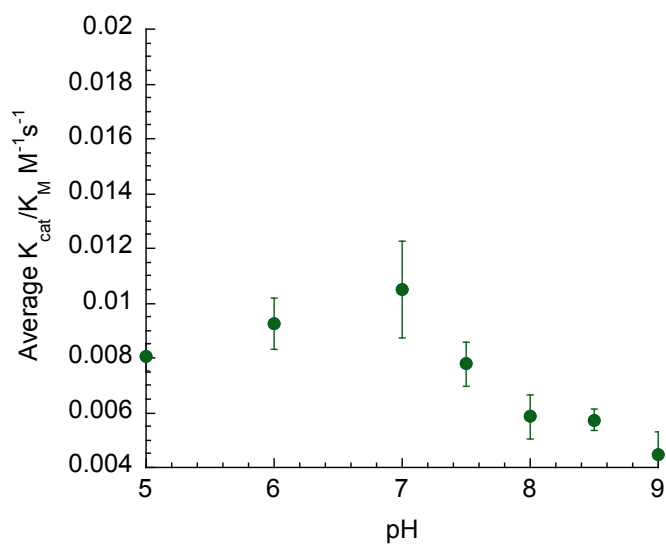**Figure S1.** pH activity profile for CaM.

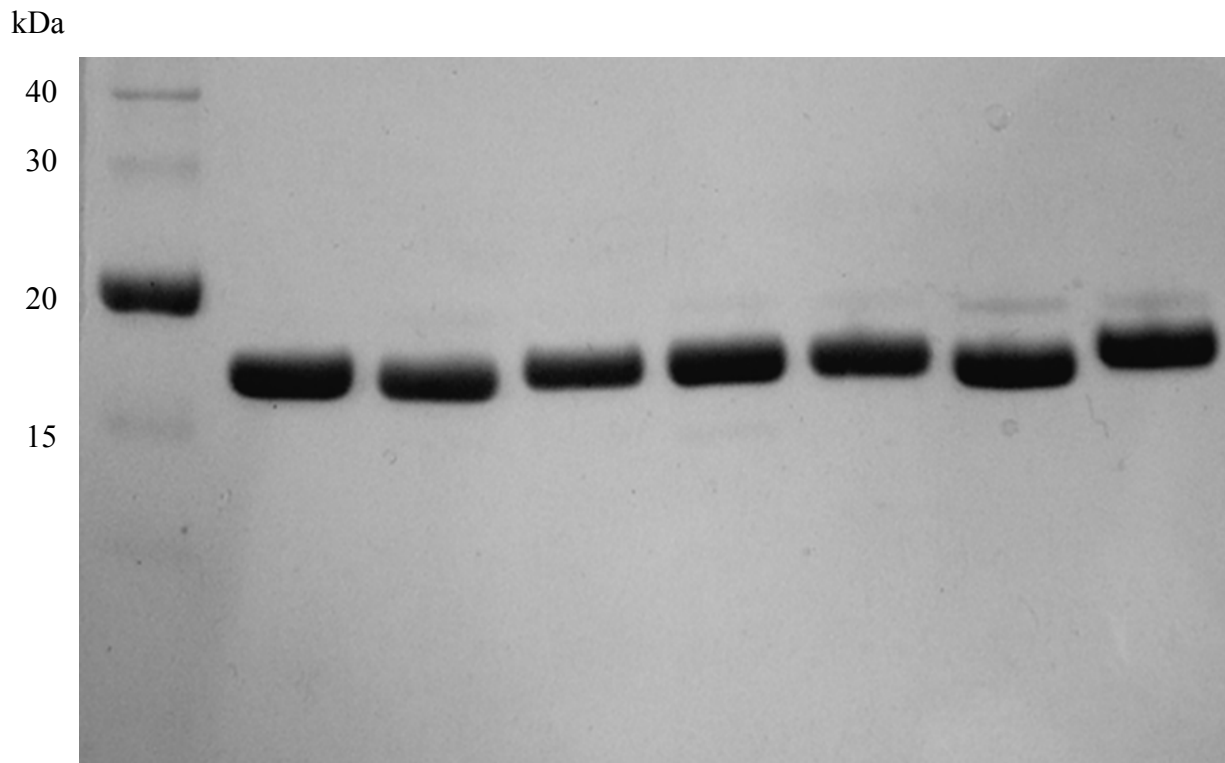

**Figure S2.** SDS-PAGE (10%) of purified mutants of CaM used in this study (left to right): V108K, A128K, F92K, M109K, L105K, M124K, F141K.

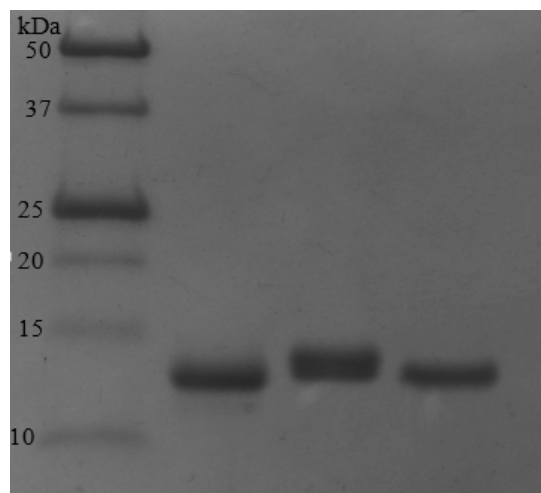

**Figure S3.** SDS-PAGE (10%) of purified proteins used in this study (left to right): ladder, cCaM, cCaMWN with affinity tag, cCaMWN.

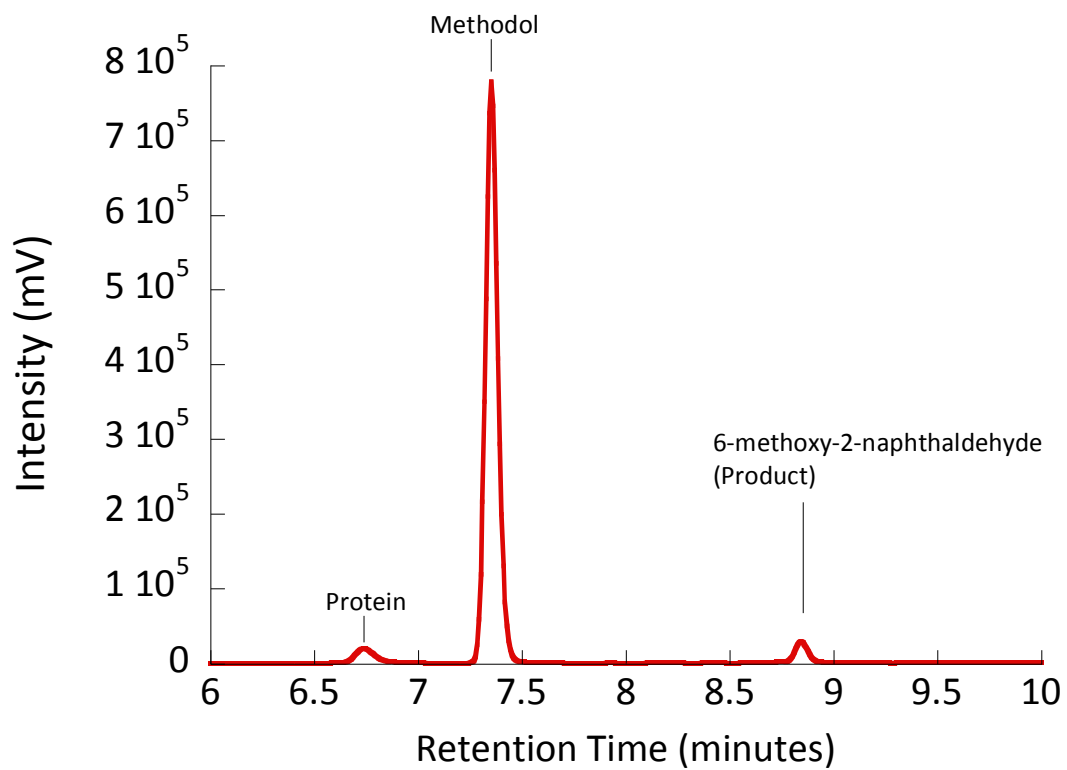

**Figure S4.** A representative HPLC chromatogram (at 254 nm) with elution times for the substrate and the product.
